# Supplementary material for: Paclitaxel-Loaded Folate-Targeted Albumin-Alginate Nanoparticles Crosslinked with Ethylenediamine. Synthesis and In Vitro Characterization
Source: MDPI journal article supplement (doi:10.3390/polym13132083), 2021-06-24
Supplement: s1 [file s1]

### Supplementary material

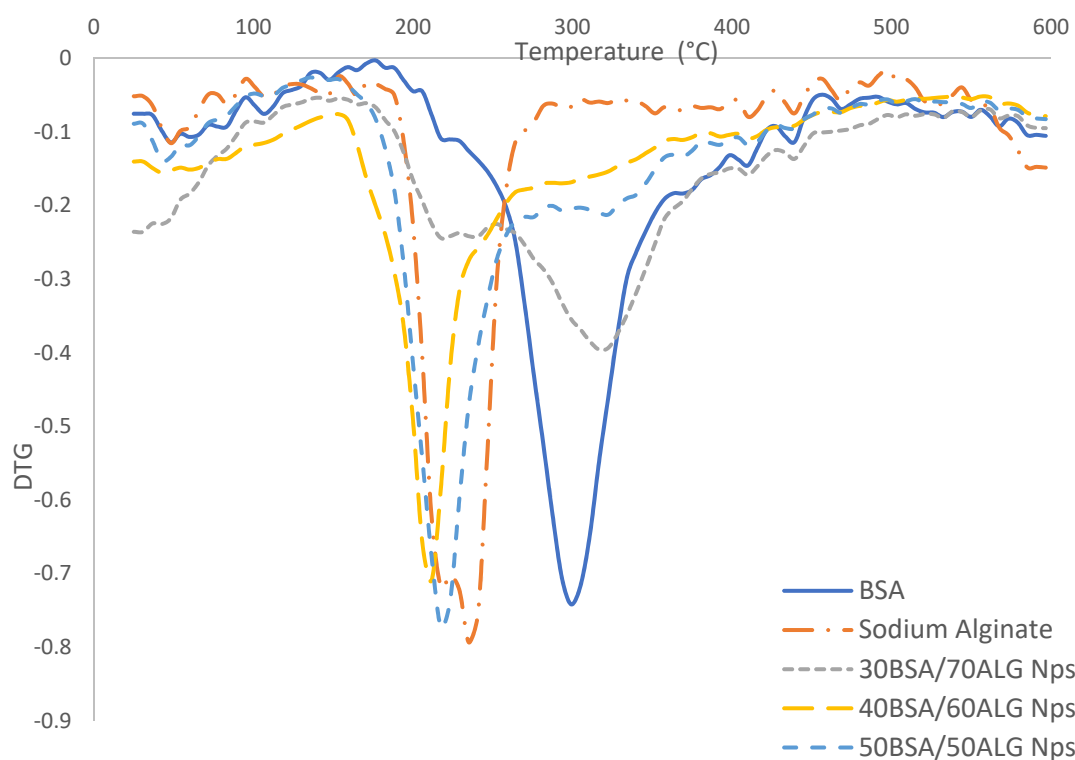

**Figure S1.** TGA first derivative curves of BSA, sodium alginate, 30BSA/70ALG Nps, 40BSA/60ALG Nps and 50BSA/50ALG Nps.

**Table S1.** Percentages (v/v) of BSA (5% w/v) and ALG (1% w/v) solutions added to each blend.

| Nanoparticles | Percentage of BSA-EDAC solution added to the blend (% v/v) | Percentage of ALG-EDAC solution added to the blend (% v/v) | Blend composition (w/w ratio) |
|---------------|------------------------------------------------------------|------------------------------------------------------------|-------------------------------|
| 30BSA/70 ALG  | 30                                                         | 70                                                         | 2BSA:1ALG                     |
| 40BSA/60 ALG  | 40                                                         | 60                                                         | 3BSA:1ALG                     |
| 50BSA/50 ALG  | 50                                                         | 50                                                         | 5BSA:1ALG                     |

**Table S2 .** Statistical parameters of nanoparticle formulations obtained after fitting the drug release data to the release kinetic models. Model fitting was attempted until 91% and 85% of drug released for PTX-30BSA/70ALG-Fol and PTX-50BSA/50ALG-Fol, respectively.

| NANOPARTICLES       | HIGUCHI                | KORSMEYER-PEPPAS |                      | ZERO ORDER            | FIRST ORDER           |
|---------------------|------------------------|------------------|----------------------|-----------------------|-----------------------|
|                     | $K_H (h)^{-1/2}$       | $K (h)^{-1}$     | n                    | $K_0 (h)^{-1}$        | $K (h)^{-1}$          |
| PTX-30BSA/70ALG-Fol | 0.892 ( $r^2= 0.969$ ) | 0.533            | 0.36 ( $r^2=0.979$ ) | 0.349 ( $r^2=0.791$ ) | 0.094 ( $r^2=0.882$ ) |
| PTX-50BSA/50ALG-Fol | 1.265 ( $r^2=0.978$ )  | 0.299            | 0.70 ( $r^2=0.979$ ) | 0.538 ( $r^2=0.941$ ) | 0.117 ( $r^2=0.979$ ) |
